# Supplementary material
Source: ML conference proceedings conference paper supplement (https://openreview.net/forum?id=p2XgjS3Qp4X)
Supplement: supplementary_material [file attachment]

## Supplementary Materials

### baller2vec++: A Look-Ahead Multi-Entity Transformer For Modeling Coordinated Agents

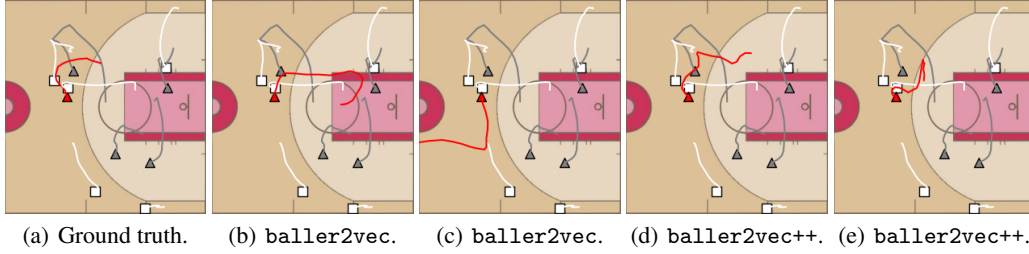

Figure S1: While `baller2vec` occasionally generates realistic trajectories for the red defender (b), it also makes egregious errors (c). In contrast, the trajectories generated by `baller2vec++` often seem plausible (d and e). For both the `baller2vec` and `baller2vec++` generated trajectories, the ground truth trajectories (a) for all of the non-red players were used as input at each time step. The red player was placed *last* in the player order when generating his trajectory with `baller2vec++`. Animated versions can be found in the code repository.
